# Supplementary material for: Rapid O 3 assimilations – Part 2: Tropospheric O 3 changes accompanied by declining NO x emissions in the USA and Europe in 2005–2020
Source: Copernicus journal article supplement (doi:10.5194/acp-23-9745-2023), 2023-09-01
Supplement: Supplementary file 1 [file acp-23-9745-2023-supplement.pdf]

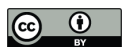

*Supplement of*

## **Rapid O<sub>3</sub> assimilations – Part 2: Tropospheric O<sub>3</sub> changes accompanied by declining NO<sub>x</sub> emissions in the USA and Europe in 2005–2020**

**Rui Zhu et al.**

*Correspondence to:* Zhe Jiang (zhejiang@ustc.edu.cn)

The copyright of individual parts of the supplement might differ from the article licence.

## Supplemental Information

### Uncertainty Analysis

The uncertainties in the averages of surface and tropospheric column O<sub>3</sub> concentrations are calculated using the bootstrapping method (Efron, 1992):

1. A bootstrap sample is generated by randomly drawing N data points from the full set of N data points. For example, the OMI O<sub>3</sub> data was averaged to produce a dataset with 2866 points (grids with 0.5°×0.625° spatial resolution over the US); N = 2866 data points were then randomly drawn from the dataset; Average of OMI O<sub>3</sub> over the US (for example, 2005) is calculated as the mean value of the randomly drawn N = 2866 data points.
2. Step 1 are repeated by 1000 times. Because the averages are based on the randomly drawn data points, we have different averages for the same year (for example, 2005). The standard deviation of the ensemble of averages represent the uncertainty in the average.
3. The above process is repeated to produce the standard deviations of averages of OMI O<sub>3</sub> over the US for various years (i.e. 2006, 2007, ... 2020).

The trends and uncertainties in the trends of surface and tropospheric column O<sub>3</sub> concentrations are calculated using the linear fitting of averages by using the least squares method.

#### Reference:

Efron, B.: Bootstrap Methods: Another Look at the Jackknife. In: Kotz, S., Johnson, N.L. (eds) Breakthroughs in Statistics. Springer Series in Statistics. Springer, New York, NY, 1992.

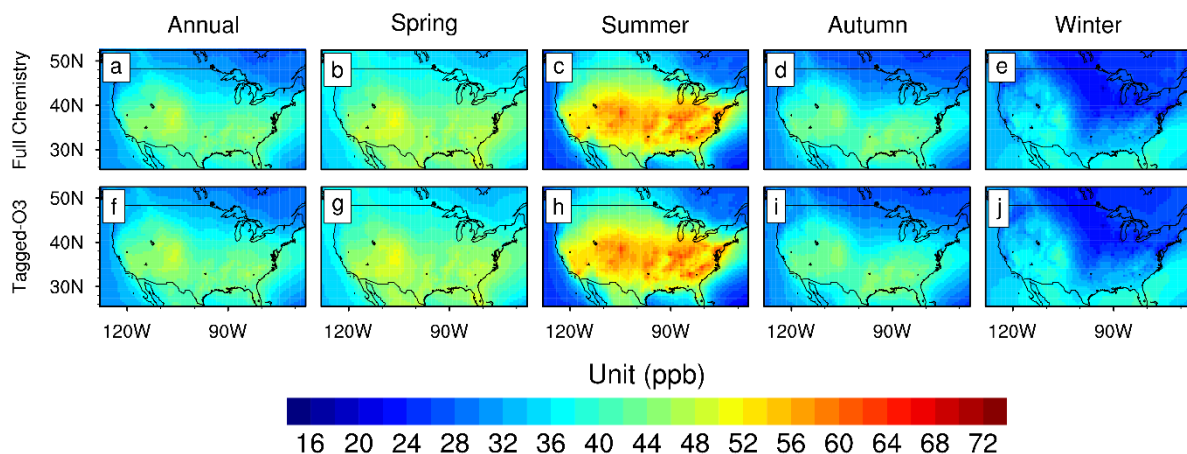

**Fig. S1.** Surface MDA8 O<sub>3</sub> over the US in 2005-2020 (annual and seasonal averages) simulated by GEOS-Chem model with (a-e) full chemistry mode; (f-j) single O<sub>3</sub> tracer (tagged-O<sub>3</sub>) mode.

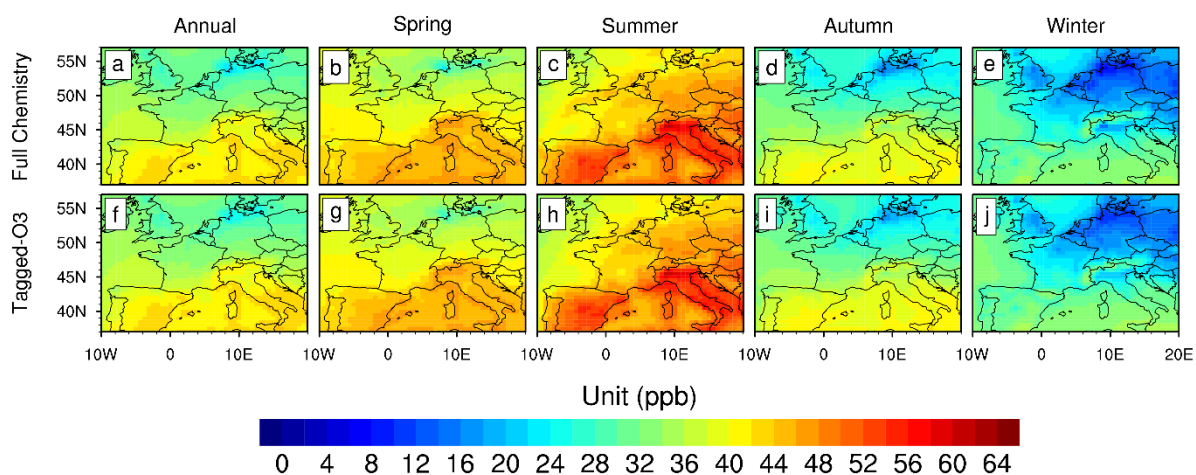

**Fig. S2.** Surface MDA8 O<sub>3</sub> over Europe in 2005-2020 (annual and seasonal averages) simulated by GEOS-Chem model with (a-e) full chemistry mode; (f-j) single O<sub>3</sub> tracer (tagged-O<sub>3</sub>) mode.

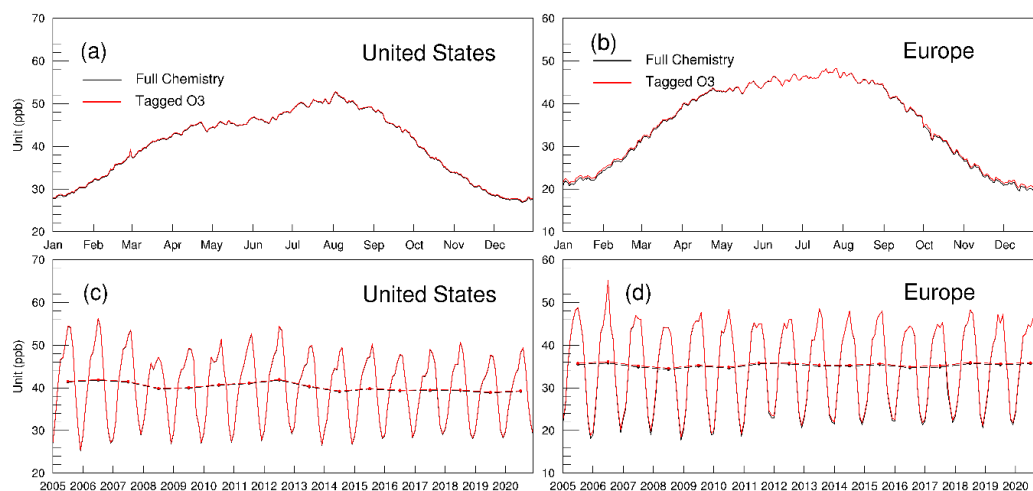

**Fig. S3.** (a-b) Daily averages of surface MDA8 O<sub>3</sub> over the US and Europe in 2005-2020 from GEOS-Chem full chemistry and single O<sub>3</sub> tracer (tagged-O<sub>3</sub>) simulations; (c-d) Monthly averages of MDA8 O<sub>3</sub>. The dashed lines in panels c-d are annual averages.

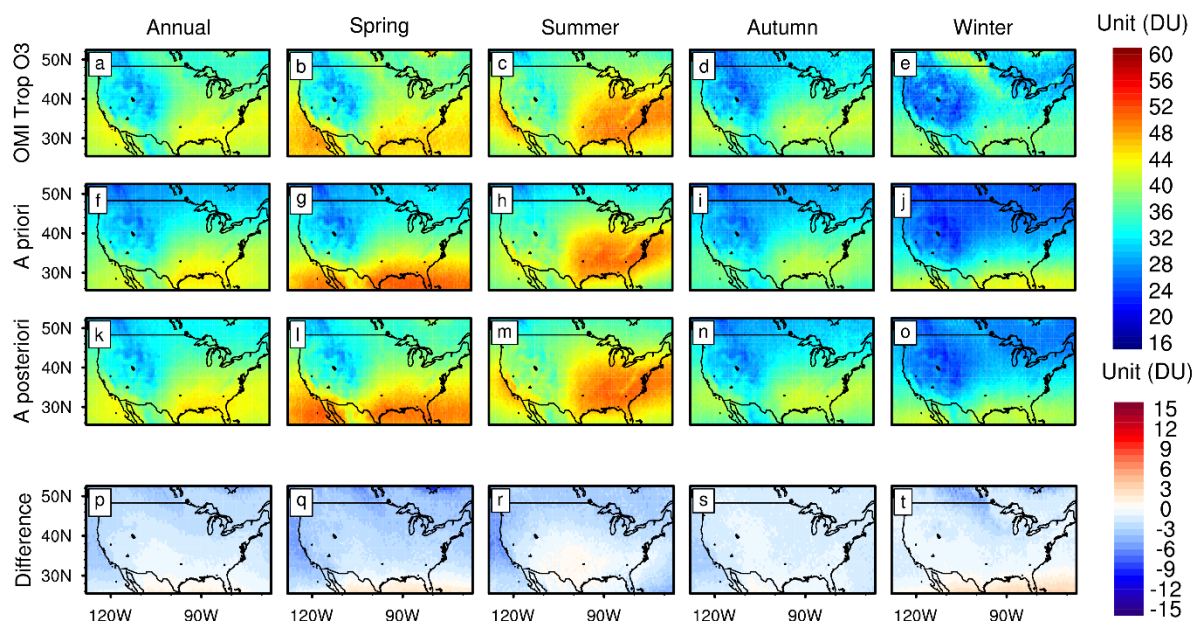

**Fig. S4.** Tropospheric O<sub>3</sub> columns over the US in 2005-2020 (annual and seasonal averages) from (a-e) OMI observations; (f-j) GEOS-Chem a priori simulation; (k-o) GEOS-Chem a posteriori simulation by assimilating OMI O<sub>3</sub> observations. (p-t) Bias in the a priori simulations calculated by a priori minus a posteriori tropospheric O<sub>3</sub> columns. The output O<sub>3</sub> profiles are convolved with OMI averaging kernels.

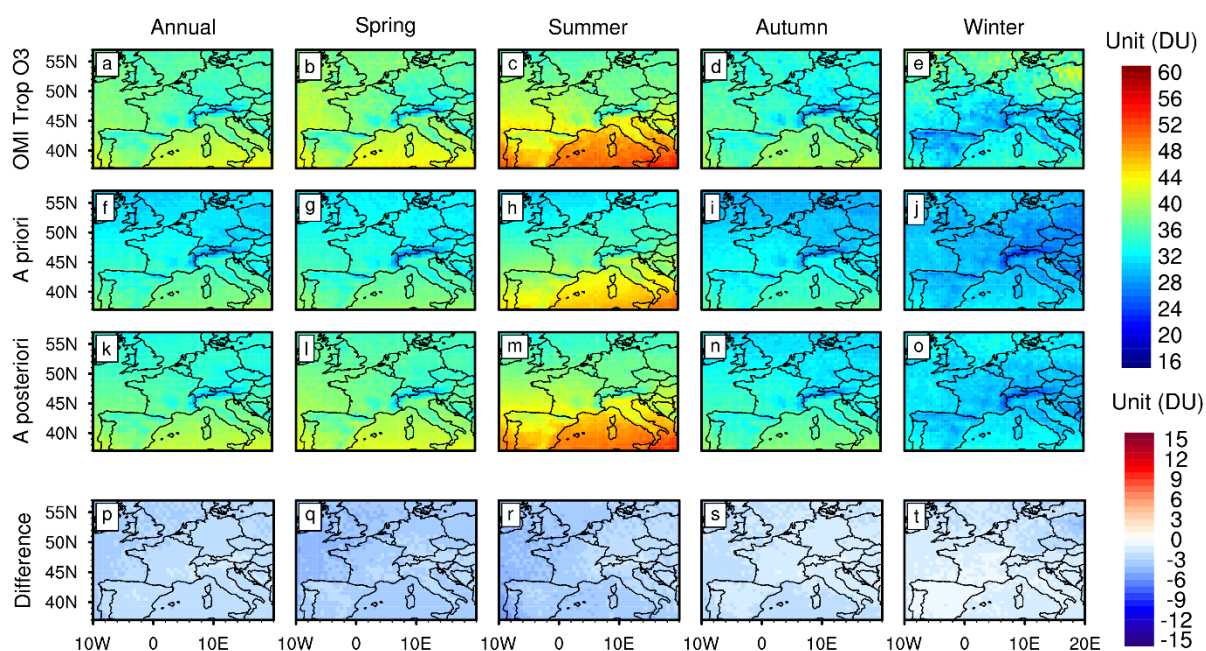

**Fig. S5.** Tropospheric O<sub>3</sub> columns over Europe in 2005-2020 (annual and seasonal averages) from (a-e) OMI observations; (f-j) GEOS-Chem a priori simulation; (k-o) GEOS-Chem a posteriori simulation by assimilating OMI O<sub>3</sub> observations. (p-t) Bias in the a priori simulations calculated by a priori minus a posteriori tropospheric O<sub>3</sub> columns. The output O<sub>3</sub> profiles are convolved with OMI averaging kernels.

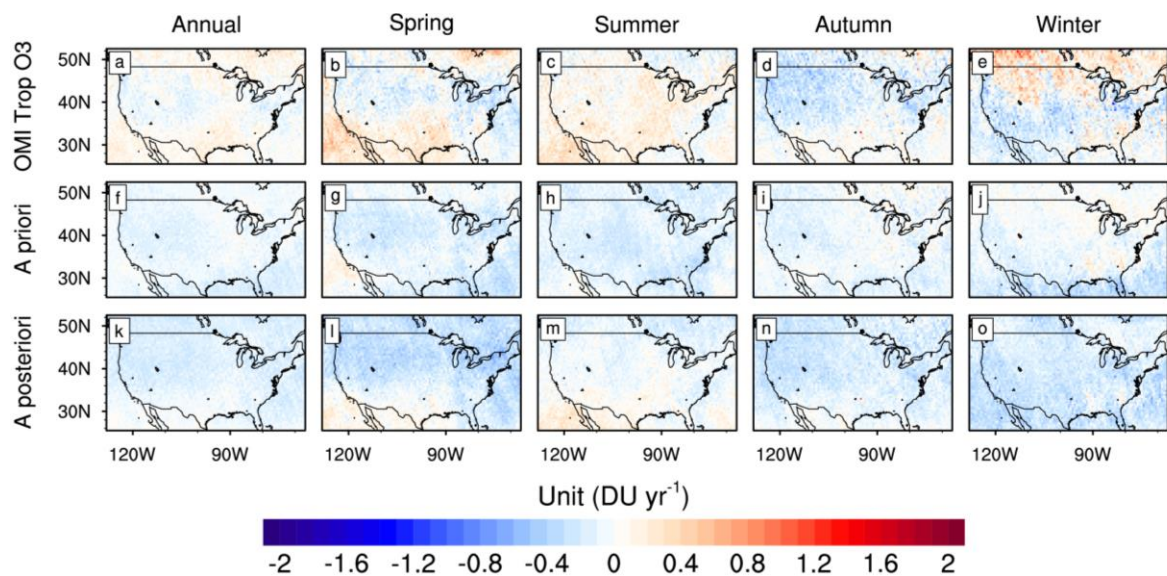

**Fig. S6.** Trends of tropospheric O<sub>3</sub> columns over the US in 2005-2020 (annual and seasonal averages) from (a-e) OMI observations; (f-j) GEOS-Chem a priori simulation; (k-o) GEOS-Chem a posteriori simulation by assimilating OMI O<sub>3</sub> observations. The output O<sub>3</sub> profiles are convolved with OMI averaging kernels.

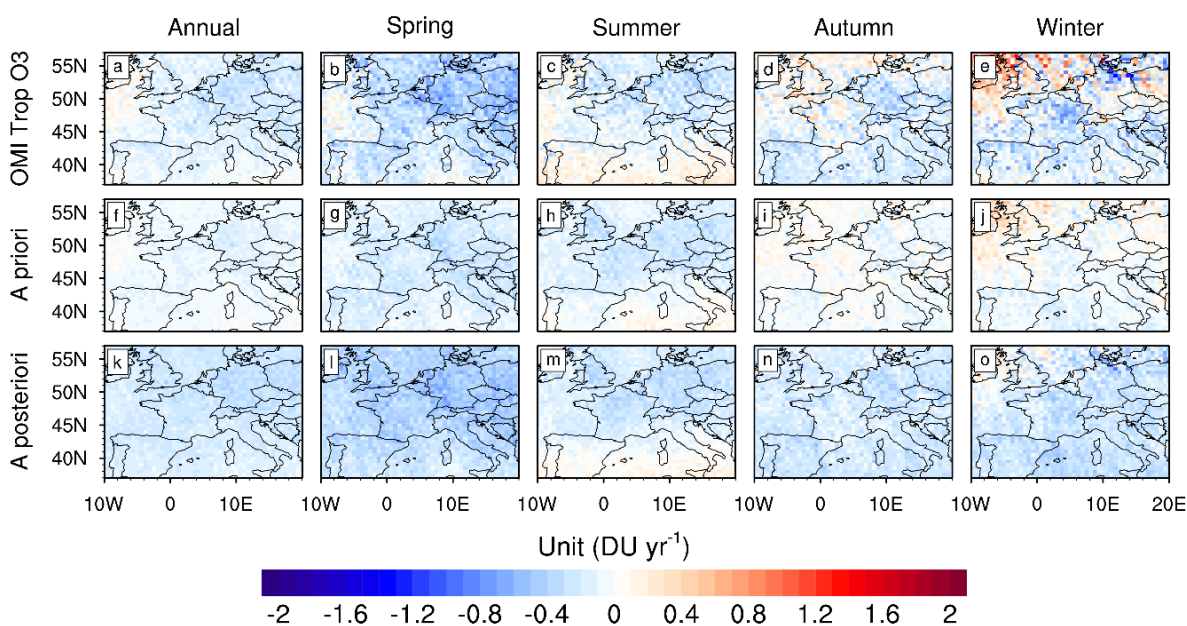

**Fig. S7.** Trends of tropospheric O<sub>3</sub> columns over Europe in 2005-2020 (annual and seasonal averages) from (a-e) OMI observations; (f-j) GEOS-Chem a priori simulation; (k-o) GEOS-Chem a posteriori simulation by assimilating OMI O<sub>3</sub> observations. The output O<sub>3</sub> profiles are convolved with OMI averaging kernels.

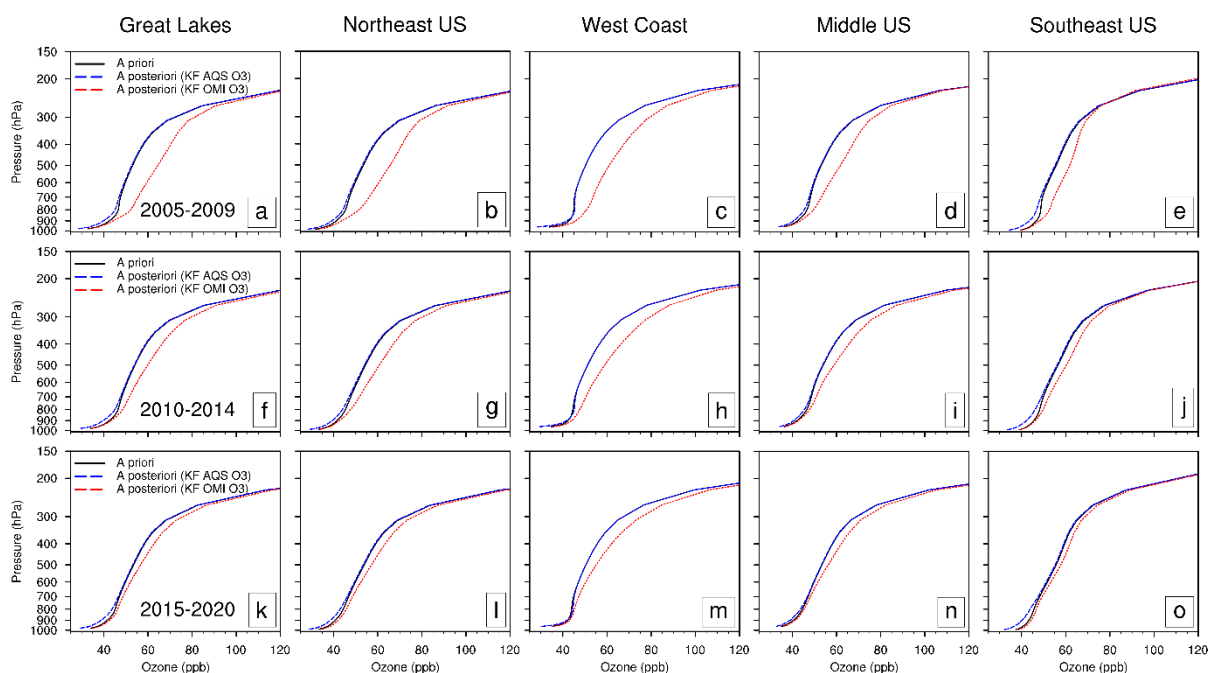

**Fig. S8.** Averages of O<sub>3</sub> vertical profiles in 2005-2020 in the US from GEOS-Chem a priori (black) and a posteriori simulations by assimilating AQS (blue) and OMI (red) O<sub>3</sub> observations.

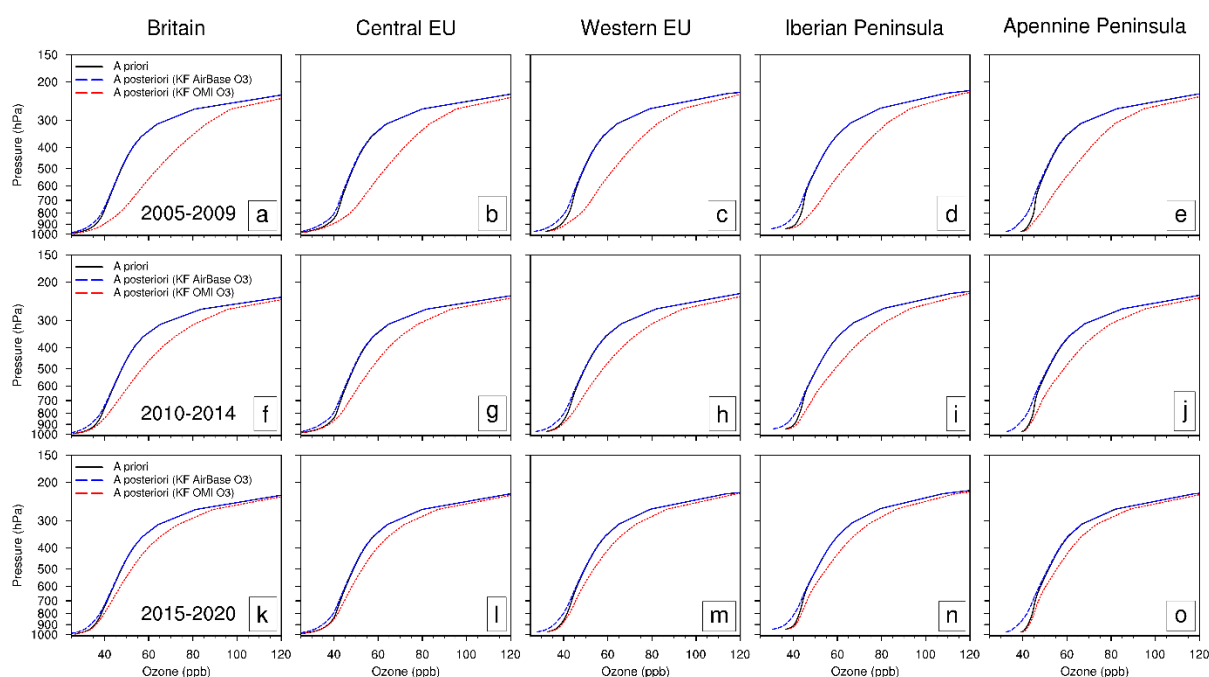

**Fig. S9.** Averages of O<sub>3</sub> vertical profiles in 2005-2020 in Europe from GEOS-Chem a priori (black) and a posteriori simulations by assimilating AirBase (blue) and OMI (red) O<sub>3</sub> observations.

| #1 Great Lakes                       |               |          | Annual   |            | Spring   |            | Summer   |            | Autumn   |            | Winter   |            |
|--------------------------------------|---------------|----------|----------|------------|----------|------------|----------|------------|----------|------------|----------|------------|
|                                      |               |          | Mean     | Trend      |
| TS1.1<br>surface<br>(sampled)        | 2005-<br>2020 | AQS      | 38.2±0.3 | -0.11±0.08 | 44.5±0.2 | -0.13±0.09 | 48.6±0.4 | -0.57±0.18 | 33.8±0.3 | -0.24±0.18 | 26.2±0.7 | 0.45±0.07  |
|                                      |               | a priori | 40.0±0.3 | -0.04±0.06 | 43.2±0.2 | -0.17±0.08 | 55.7±0.4 | -0.45±0.19 | 37.1±0.4 | 0.09±0.10  | 24.1±0.3 | 0.35±0.06  |
|                                      |               | KF-AQS   | 37.7±0.2 | -0.07±0.06 | 43.5±0.2 | -0.13±0.08 | 49.0±0.3 | -0.51±0.18 | 33.1±0.2 | -0.03±0.12 | 25.4±0.2 | 0.39±0.06  |
| TS1.2<br>surface                     | 2005-<br>2020 | a priori | 40.2±0.2 | -0.06±0.06 | 43.4±0.2 | -0.18±0.08 | 55.7±0.4 | -0.47±0.18 | 37.4±0.3 | 0.09±0.10  | 24.8±0.2 | 0.27±0.07  |
|                                      |               | KF-AQS   | 37.9±0.1 | -0.09±0.06 | 43.5±0.1 | -0.14±0.08 | 49.1±0.2 | -0.52±0.17 | 33.5±0.2 | -0.04±0.12 | 25.7±0.2 | 0.30±0.05  |
| TS1.3 trop.<br>column<br>(convolved) | 2005-<br>2020 | OMI      | 39.3±0.1 | -0.09±0.06 | 40.6±0.1 | -0.16±0.11 | 46.9±0.1 | 0.12±0.12  | 36.7±0.2 | -0.17±0.05 | 32.8±0.2 | -0.15±0.15 |
|                                      |               | a priori | 36.9±0.2 | -0.11±0.05 | 37.5±0.2 | -0.16±0.10 | 45.9±0.2 | -0.13±0.10 | 35.0±0.2 | -0.09±0.04 | 29.1±0.1 | -0.03±0.05 |
|                                      |               | KF-OMI   | 38.8±0.1 | -0.21±0.04 | 40.4±0.1 | -0.31±0.10 | 47.7±0.1 | -0.03±0.09 | 36.3±0.1 | -0.23±0.03 | 30.4±0.1 | -0.24±0.05 |
| TS1.4<br>trop.<br>Column             | 2005-<br>2020 | a priori | 37.4±0.2 | -0.03±0.05 | 38.1±0.2 | -0.12±0.10 | 45.9±0.2 | -0.13±0.14 | 35.8±0.2 | 0.03±0.09  | 30.1±0.2 | 0.12±0.08  |
|                                      |               | KF-AQS   | 36.8±0.2 | -0.03±0.05 | 37.9±0.2 | -0.10±0.09 | 44.3±0.2 | -0.13±0.14 | 35.0±0.2 | 0.01±0.09  | 30.1±0.2 | 0.12±0.08  |
|                                      |               | KF-OMI   | 40.2±0.1 | -0.29±0.05 | 42.5±0.1 | -0.44±0.09 | 48.3±0.2 | -0.09±0.12 | 37.8±0.1 | -0.23±0.10 | 32.2±0.2 | -0.39±0.11 |
|                                      | 2005-<br>2009 | KF-AQS   | 36.6±0.2 | -0.48±0.16 | 38.0±0.2 | -0.32±0.39 | 44.1±0.2 | -1.57±0.12 | 34.9±0.2 | -0.37±0.72 | 29.3±0.2 | -0.10±0.29 |
|                                      |               | KF-OMI   | 41.8±0.1 | -0.42±0.29 | 44.5±0.1 | -0.29±0.35 | 47.6±0.1 | -1.30±0.15 | 39.4±0.1 | -0.52±0.82 | 35.3±0.1 | -0.47±0.44 |
|                                      | 2010-<br>2014 | KF-AQS   | 37.1±0.2 | -0.63±0.24 | 38.4±0.2 | -1.15±0.74 | 45.5±0.2 | -1.95±0.30 | 34.7±0.2 | -0.11±0.47 | 30.1±0.2 | -0.06±0.88 |
|                                      |               | KF-OMI   | 40.2±0.1 | -0.97±0.22 | 43.1±0.1 | -1.45±0.73 | 49.6±0.2 | -1.77±0.23 | 37.0±0.2 | -0.41±0.50 | 30.7±0.2 | -0.49±0.76 |
|                                      | 2015-<br>2020 | KF-AQS   | 36.7±0.2 | 0.05±0.12  | 37.4±0.1 | -0.04±0.29 | 43.7±0.2 | 0.38±0.47  | 35.3±0.1 | -0.19±0.43 | 30.8±0.2 | 0.11±0.26  |
|                                      |               | KF-OMI   | 38.9±0.1 | -0.15±0.12 | 40.2±0.1 | -0.41±0.34 | 47.7±0.2 | 0.16±0.37  | 37.1±0.1 | -0.35±0.37 | 30.9±0.2 | 0.02±0.23  |

**Table. S1.** Averages (with units ppb or DU) and trends (with units ppb yr<sup>-1</sup> or DU yr<sup>-1</sup>) of surface and tropospheric column O<sub>3</sub> concentrations in 2005-2020 over Great Lakes (Region #1) from observations (AQS and OMI) and a priori and a posteriori (KF) simulations. Grids with low and medium anthropogenic NO<sub>x</sub> emissions are excluded in Great Lakes.

| #2 Northeast US                      |               |          | Annual   |            | Spring   |            | Summer   |            | Autumn   |            | Winter   |            |
|--------------------------------------|---------------|----------|----------|------------|----------|------------|----------|------------|----------|------------|----------|------------|
|                                      |               |          | Mean     | Trend      |
| TS2.1<br>surface<br>(sampled)        | 2005-<br>2020 | AQS      | 37.4±0.4 | -0.07±0.06 | 43.9±0.3 | -0.11±0.07 | 47.1±0.6 | -0.61±0.13 | 31.9±0.3 | -0.05±0.14 | 27.2±0.6 | 0.42±0.08  |
|                                      |               | a priori | 38.1±0.4 | 0.03±0.04  | 41.6±0.3 | -0.02±0.05 | 52.2±1.0 | -0.41±0.12 | 34.7±0.4 | 0.20±0.09  | 24.1±0.3 | 0.33±0.06  |
|                                      |               | KF-AQS   | 36.4±0.2 | -0.04±0.05 | 42.4±0.2 | -0.08±0.06 | 46.3±0.6 | -0.52±0.11 | 31.0±0.3 | 0.05±0.12  | 26.2±0.3 | 0.36±0.06  |
| TS2.2<br>surface                     | 2005-<br>2020 | a priori | 38.4±0.4 | 0.01±0.04  | 41.9±0.3 | -0.05±0.05 | 52.4±0.7 | -0.42±0.12 | 34.9±0.3 | 0.19±0.09  | 24.7±0.3 | 0.28±0.06  |
|                                      |               | KF-AQS   | 36.6±0.2 | -0.06±0.05 | 42.5±0.2 | -0.11±0.06 | 46.4±0.7 | -0.53±0.11 | 31.2±0.3 | 0.03±0.12  | 26.5±0.2 | 0.32±0.05  |
| TS2.3 trop.<br>column<br>(convolved) | 2005-<br>2020 | OMI      | 39.3±0.1 | -0.12±0.04 | 40.8±0.2 | -0.21±0.09 | 47.3±0.2 | 0.02±0.10  | 37.2±0.2 | -0.21±0.06 | 31.9±0.2 | -0.08±0.11 |
|                                      |               | a priori | 37.0±0.2 | -0.11±0.04 | 37.1±0.2 | -0.18±0.09 | 45.8±0.3 | -0.13±0.09 | 35.3±0.2 | -0.11±0.04 | 29.6±0.1 | 0.00±0.04  |
|                                      |               | KF-OMI   | 38.8±0.2 | -0.22±0.03 | 40.1±0.2 | -0.36±0.08 | 48.0±0.3 | -0.06±0.08 | 36.7±0.2 | -0.27±0.04 | 30.5±0.2 | -0.17±0.04 |
| TS2.4<br>trop.<br>Column             | 2005-<br>2020 | a priori | 37.4±0.2 | -0.02±0.04 | 38.0±0.2 | -0.07±0.09 | 45.3±0.3 | -0.17±0.12 | 35.9±0.2 | 0.04±0.07  | 30.5±0.2 | 0.14±0.08  |
|                                      |               | KF-AQS   | 36.8±0.2 | -0.02±0.04 | 37.9±0.2 | -0.07±0.09 | 43.7±0.2 | -0.18±0.11 | 35.1±0.2 | 0.02±0.07  | 30.6±0.2 | 0.14±0.08  |
|                                      |               | KF-OMI   | 40.3±0.2 | -0.31±0.04 | 42.9±0.1 | -0.48±0.09 | 47.9±0.2 | -0.12±0.11 | 37.8±0.2 | -0.21±0.07 | 32.7±0.2 | -0.39±0.12 |
|                                      | 2005-<br>2009 | KF-AQS   | 36.6±0.2 | -0.33±0.05 | 37.7±0.2 | 0.00±0.16  | 43.9±0.2 | -1.21±0.22 | 34.9±0.2 | -0.67±0.48 | 30.0±0.2 | -0.07±0.46 |
|                                      |               | KF-OMI   | 42.0±0.2 | -0.33±0.20 | 45.1±0.1 | -0.11±0.23 | 47.6±0.2 | -0.89±0.39 | 39.1±0.2 | -0.74±0.54 | 36.2±0.2 | -0.63±0.47 |
|                                      | 2010-<br>2014 | KF-AQS   | 37.1±0.2 | -0.51±0.16 | 38.6±0.2 | -0.91±0.81 | 44.7±0.3 | -1.96±0.13 | 35.0±0.2 | -0.15±0.38 | 30.2±0.2 | -0.03±0.76 |
|                                      |               | KF-OMI   | 40.4±0.2 | -0.86±0.12 | 43.9±0.2 | -1.16±0.78 | 48.9±0.3 | -1.92±0.11 | 37.3±0.2 | -0.42±0.32 | 30.6±0.2 | -0.46±0.67 |
|                                      | 2015-<br>2020 | KF-AQS   | 36.6±0.2 | 0.10±0.13  | 37.4±0.2 | -0.07±0.31 | 42.8±0.2 | 0.20±0.32  | 35.4±0.2 | -0.13±0.36 | 31.4±0.2 | 0.28±0.27  |
|                                      |               | KF-OMI   | 38.9±0.2 | -0.08±0.15 | 40.2±0.2 | -0.46±0.41 | 47.2±0.2 | 0.03±0.22  | 37.2±0.2 | -0.23±0.31 | 31.5±0.2 | 0.20±0.25  |

**Table. S2.** Averages (with units ppb or DU) and trends (with units ppb yr<sup>-1</sup> or DU yr<sup>-1</sup>) of surface and tropospheric column O<sub>3</sub> concentrations in 2005-2020 over Northeast US (Region #2) from observations (AQS and OMI) and a priori and a posteriori (KF) simulations. Grids with low and medium anthropogenic NO<sub>x</sub> emissions are excluded in Northeast US.

| #3 West Coast                        |               |          | Annual   |            | Spring   |            | Summer   |            | Autumn   |            | Winter   |            |
|--------------------------------------|---------------|----------|----------|------------|----------|------------|----------|------------|----------|------------|----------|------------|
|                                      |               |          | Mean     | Trend      |
| TS3.1<br>surface<br>(sampled)        | 2005-<br>2020 | AQS      | 41.0±1.5 | 0.15±0.05  | 44.5±1.1 | -0.07±0.09 | 50.8±2.5 | -0.15±0.12 | 41.0±1.3 | 0.39±0.05  | 28.1±0.8 | 0.37±0.06  |
|                                      |               | a priori | 41.6±0.7 | -0.01±0.03 | 43.8±0.7 | -0.18±0.06 | 49.2±1.1 | -0.09±0.11 | 40.8±0.6 | 0.12±0.04  | 32.9±0.5 | 0.08±0.03  |
|                                      |               | KF-AQS   | 41.2±1.1 | 0.11±0.04  | 44.5±1.0 | -0.10±0.08 | 50.6±1.9 | -0.13±0.11 | 41.4±1.1 | 0.34±0.04  | 28.8±0.8 | 0.29±0.05  |
| TS3.2<br>surface                     | 2005-<br>2020 | a priori | 41.6±0.7 | -0.01±0.03 | 43.8±0.6 | -0.18±0.06 | 49.2±1.2 | -0.09±0.11 | 40.8±0.6 | 0.12±0.04  | 32.9±0.5 | 0.08±0.03  |
|                                      |               | KF-AQS   | 41.2±1.1 | 0.11±0.04  | 44.5±0.9 | -0.10±0.08 | 50.6±2.2 | -0.13±0.11 | 41.4±1.0 | 0.34±0.04  | 28.8±0.9 | 0.29±0.05  |
| TS3.3 trop.<br>column<br>(convolved) | 2005-<br>2020 | OMI      | 39.2±0.4 | 0.00±0.08  | 42.1±0.5 | 0.21±0.12  | 43.8±0.4 | 0.13±0.09  | 37.9±0.4 | -0.15±0.10 | 32.7±0.5 | -0.19±0.16 |
|                                      |               | a priori | 37.5±0.4 | -0.09±0.04 | 39.5±0.4 | -0.06±0.07 | 42.7±0.3 | -0.12±0.06 | 35.6±0.3 | -0.09±0.06 | 31.9±0.4 | -0.10±0.08 |
|                                      |               | KF-OMI   | 39.8±0.3 | -0.14±0.06 | 43.2±0.5 | -0.06±0.09 | 45.2±0.4 | 0.02±0.08  | 37.7±0.4 | -0.23±0.07 | 32.7±0.4 | -0.28±0.09 |
| TS3.4<br>trop.<br>Column             | 2005-<br>2020 | a priori | 38.2±0.4 | -0.02±0.04 | 38.9±0.6 | -0.09±0.07 | 42.5±0.4 | -0.15±0.09 | 36.5±0.3 | 0.00±0.07  | 34.9±0.6 | 0.07±0.09  |
|                                      |               | KF-AQS   | 38.1±0.4 | -0.01±0.04 | 38.9±0.6 | -0.09±0.07 | 42.6±0.4 | -0.16±0.10 | 36.5±0.4 | 0.02±0.06  | 34.6±0.5 | 0.09±0.09  |
|                                      |               | KF-OMI   | 41.9±0.4 | -0.26±0.04 | 44.9±0.4 | -0.37±0.11 | 46.6±0.4 | -0.08±0.09 | 39.5±0.4 | -0.29±0.08 | 36.7±0.5 | -0.38±0.10 |
|                                      | 2005-<br>2009 | KF-AQS   | 38.0±0.4 | 0.07±0.18  | 38.9±0.4 | -0.17±0.28 | 42.9±0.4 | -0.48±0.51 | 36.6±0.3 | -0.08±0.52 | 34.0±0.6 | -0.01±0.66 |
|                                      |               | KF-OMI   | 43.2±0.3 | 0.19±0.19  | 45.9±0.3 | -0.06±0.34 | 46.1±0.3 | -0.17±0.15 | 41.6±0.3 | -0.16±0.74 | 39.8±0.5 | -0.20±0.56 |
|                                      | 2010-<br>2014 | KF-AQS   | 38.3±0.4 | -0.11±0.16 | 39.8±0.7 | 0.00±0.61  | 43.1±0.4 | -1.21±0.27 | 36.5±0.4 | 0.17±0.29  | 34.5±0.6 | 0.60±0.50  |
|                                      |               | KF-OMI   | 42.3±0.4 | -0.72±0.18 | 46.8±0.5 | -1.04±0.67 | 47.8±0.4 | -1.56±0.21 | 39.1±0.3 | -0.11±0.37 | 35.3±0.5 | 0.18±0.47  |
|                                      | 2015-<br>2020 | KF-AQS   | 38.0±0.4 | -0.07±0.25 | 38.2±0.4 | -0.29±0.23 | 41.8±0.4 | -0.11±0.52 | 36.5±0.4 | 0.53±0.23  | 35.0±0.5 | -0.31±0.44 |
|                                      |               | KF-OMI   | 40.6±0.4 | -0.30±0.18 | 42.6±0.4 | -0.72±0.33 | 46.0±0.4 | -0.19±0.29 | 38.0±0.4 | 0.15±0.17  | 35.3±0.6 | -0.44±0.40 |

**Table. S3.** Averages (with units ppb or DU) and trends (with units ppb yr<sup>-1</sup> or DU yr<sup>-1</sup>) of surface and tropospheric column O<sub>3</sub> concentrations in 2005-2020 over West Coast (Region #3) from observations (AQS and OMI) and a priori and a posteriori (KF) simulations. Grids with low and medium anthropogenic NO<sub>x</sub> emissions are excluded in West Coast.

| #4 Middle US                         |               |          | Annual   |            | Spring   |            | Summer   |            | Autumn   |            | Winter   |            |
|--------------------------------------|---------------|----------|----------|------------|----------|------------|----------|------------|----------|------------|----------|------------|
|                                      |               |          | Mean     | Trend      |
| TS4.1<br>surface<br>(sampled)        | 2005-<br>2020 | AQS      | 39.7±0.3 | -0.30±0.09 | 44.3±0.3 | -0.29±0.10 | 46.0±0.5 | -0.62±0.21 | 37.8±0.5 | -0.35±0.15 | 31.0±0.4 | -0.06±0.08 |
|                                      |               | a priori | 42.2±0.3 | -0.28±0.06 | 44.8±0.3 | -0.40±0.06 | 55.2±0.4 | -0.61±0.18 | 40.6±0.5 | -0.18±0.10 | 28.3±0.4 | 0.02±0.07  |
|                                      |               | KF-AQS   | 40.4±0.3 | -0.29±0.08 | 44.8±0.2 | -0.33±0.09 | 48.5±0.4 | -0.61±0.19 | 38.4±0.5 | -0.30±0.13 | 30.2±0.4 | -0.01±0.07 |
| TS4.2<br>surface                     | 2005-<br>2020 | a priori | 41.3±0.1 | -0.23±0.06 | 44.1±0.1 | -0.34±0.06 | 54.1±0.1 | -0.48±0.17 | 39.3±0.2 | -0.18±0.09 | 27.8±0.2 | 0.04±0.06  |
|                                      |               | KF-AQS   | 40.0±0.1 | -0.21±0.06 | 44.1±0.1 | -0.28±0.07 | 49.8±0.2 | -0.46±0.17 | 37.6±0.2 | -0.22±0.10 | 28.7±0.1 | 0.05±0.05  |
| TS4.3 trop.<br>column<br>(convolved) | 2005-<br>2020 | OMI      | 39.0±0.1 | 0.02±0.05  | 40.8±0.1 | 0.11±0.11  | 44.4±0.1 | 0.16±0.10  | 37.2±0.1 | -0.06±0.07 | 33.8±0.1 | -0.12±0.11 |
|                                      |               | a priori | 38.2±0.2 | -0.10±0.04 | 39.5±0.2 | -0.11±0.08 | 46.3±0.1 | -0.17±0.08 | 36.1±0.1 | -0.06±0.05 | 31.0±0.2 | -0.05±0.05 |
|                                      |               | KF-OMI   | 39.4±0.1 | -0.13±0.05 | 41.8±0.2 | -0.13±0.09 | 46.4±0.1 | 0.00±0.08  | 37.2±0.1 | -0.14±0.06 | 32.1±0.2 | -0.24±0.05 |
| TS4.4<br>trop.<br>Column             | 2005-<br>2020 | a priori | 39.3±0.2 | -0.08±0.06 | 40.8±0.3 | -0.19±0.12 | 46.1±0.1 | -0.18±0.12 | 36.6±0.2 | -0.02±0.08 | 33.9±0.3 | 0.04±0.11  |
|                                      |               | KF-AQS   | 38.9±0.2 | -0.07±0.06 | 40.8±0.3 | -0.17±0.12 | 45.1±0.1 | -0.17±0.12 | 36.2±0.1 | -0.02±0.07 | 33.9±0.3 | 0.05±0.11  |
|                                      |               | KF-OMI   | 41.5±0.2 | -0.24±0.05 | 44.4±0.2 | -0.33±0.12 | 47.7±0.1 | -0.09±0.11 | 38.5±0.1 | -0.21±0.08 | 35.4±0.3 | -0.34±0.11 |
|                                      | 2005-<br>2009 | KF-AQS   | 39.0±0.2 | -0.43±0.21 | 41.1±0.2 | -0.62±0.78 | 45.3±0.1 | -1.44±0.20 | 36.1±0.1 | -0.15±0.50 | 33.3±0.3 | -0.58±0.53 |
|                                      |               | KF-OMI   | 42.6±0.1 | -0.30±0.17 | 45.4±0.2 | -0.42±0.75 | 47.3±0.1 | -1.26±0.07 | 39.8±0.1 | -0.14±0.61 | 37.9±0.3 | -0.59±0.49 |
|                                      | 2010-<br>2014 | KF-AQS   | 39.4±0.2 | -0.60±0.47 | 41.6±0.3 | -1.20±0.66 | 45.9±0.1 | -1.37±0.76 | 36.4±0.1 | -0.31±0.41 | 34.0±0.3 | -0.49±0.98 |
|                                      |               | KF-OMI   | 41.8±0.2 | -0.88±0.37 | 45.7±0.2 | -1.47±0.57 | 48.8±0.1 | -1.25±0.75 | 38.3±0.2 | -0.50±0.41 | 34.2±0.2 | -0.81±0.87 |
|                                      | 2015-<br>2020 | KF-AQS   | 38.5±0.2 | 0.07±0.11  | 39.7±0.2 | 0.11±0.50  | 44.2±0.1 | 0.28±0.36  | 36.1±0.1 | 0.00±0.42  | 34.3±0.3 | -0.02±0.47 |
|                                      |               | KF-OMI   | 40.3±0.2 | -0.12±0.15 | 42.4±0.2 | -0.23±0.52 | 47.1±0.1 | 0.19±0.29  | 37.6±0.1 | -0.25±0.38 | 34.2±0.3 | -0.13±0.44 |

**Table. S4.** Averages (with units ppb or DU) and trends (with units ppb yr<sup>-1</sup> or DU yr<sup>-1</sup>) of surface and tropospheric column O<sub>3</sub> concentrations in 2005-2020 over Middle US (Region #4) from observations (AQS and OMI) and a priori and a posteriori (KF) simulations.

| #5 Southeast US                      |               |          | Annual   |            | Spring   |            | Summer   |            | Autumn   |            | Winter   |            |
|--------------------------------------|---------------|----------|----------|------------|----------|------------|----------|------------|----------|------------|----------|------------|
|                                      |               |          | Mean     | Trend      |
| TS5.1<br>surface<br>(sampled)        | 2005-<br>2020 | AQS      | 39.9±0.3 | -0.47±0.09 | 46.9±0.2 | -0.54±0.13 | 42.6±0.5 | -0.92±0.18 | 37.6±0.3 | -0.44±0.19 | 32.7±0.3 | -0.03±0.06 |
|                                      |               | a priori | 44.4±0.1 | -0.38±0.06 | 46.6±0.1 | -0.47±0.07 | 54.8±0.5 | -0.86±0.15 | 43.3±0.1 | -0.24±0.11 | 33.2±0.3 | 0.00±0.12  |
|                                      |               | KF-AQS   | 40.3±0.1 | -0.43±0.08 | 46.3±0.1 | -0.52±0.11 | 44.7±0.4 | -0.87±0.16 | 37.8±0.2 | -0.37±0.15 | 32.6±0.3 | -0.02±0.06 |
| TS5.2<br>surface                     | 2005-<br>2020 | a priori | 43.7±0.1 | -0.39±0.06 | 46.0±0.1 | -0.47±0.07 | 53.1±0.3 | -0.84±0.15 | 42.9±0.1 | -0.26±0.10 | 33.0±0.1 | -0.02±0.12 |
|                                      |               | KF-AQS   | 40.6±0.0 | -0.39±0.07 | 45.3±0.1 | -0.48±0.09 | 45.3±0.2 | -0.78±0.14 | 38.9±0.1 | -0.33±0.13 | 32.8±0.1 | 0.00±0.08  |
| TS5.3 trop.<br>column<br>(convolved) | 2005-<br>2020 | OMI      | 42.7±0.1 | 0.06±0.07  | 44.5±0.1 | 0.06±0.12  | 48.9±0.1 | 0.09±0.11  | 40.4±0.1 | 0.00±0.07  | 36.9±0.1 | 0.07±0.12  |
|                                      |               | a priori | 42.8±0.1 | -0.11±0.04 | 45.3±0.1 | -0.13±0.10 | 49.3±0.1 | -0.21±0.09 | 40.1±0.1 | -0.08±0.06 | 36.6±0.2 | -0.02±0.06 |
|                                      |               | KF-OMI   | 43.6±0.1 | -0.10±0.05 | 46.8±0.1 | -0.13±0.10 | 49.8±0.1 | -0.02±0.09 | 41.0±0.0 | -0.13±0.06 | 36.9±0.1 | -0.14±0.06 |
| TS5.4<br>trop.<br>Column             | 2005-<br>2020 | a priori | 44.3±0.1 | -0.19±0.07 | 47.4±0.2 | -0.34±0.15 | 48.1±0.1 | -0.26±0.12 | 40.0±0.0 | -0.07±0.09 | 42.2±0.2 | -0.09±0.15 |
|                                      |               | KF-AQS   | 43.5±0.1 | -0.18±0.07 | 47.1±0.2 | -0.34±0.15 | 46.1±0.1 | -0.23±0.11 | 39.2±0.1 | -0.08±0.10 | 42.1±0.2 | -0.09±0.15 |
|                                      |               | KF-OMI   | 45.8±0.1 | -0.28±0.07 | 49.8±0.2 | -0.42±0.15 | 49.4±0.1 | -0.17±0.11 | 41.6±0.0 | -0.20±0.08 | 42.7±0.1 | -0.34±0.17 |
|                                      | 2005-<br>2009 | KF-AQS   | 44.1±0.1 | -0.23±0.44 | 48.0±0.2 | -1.06±1.15 | 46.5±0.1 | -0.61±0.32 | 38.9±0.1 | -0.40±0.35 | 43.3±0.3 | -0.32±0.66 |
|                                      |               | KF-OMI   | 46.9±0.1 | -0.22±0.27 | 51.0±0.1 | -0.98±1.03 | 49.3±0.1 | -0.64±0.30 | 42.1±0.0 | -0.39±0.34 | 45.9±0.2 | -0.15±0.56 |
|                                      | 2010-<br>2014 | KF-AQS   | 44.3±0.1 | -1.05±0.30 | 48.7±0.2 | -1.53±0.59 | 47.3±0.1 | -1.83±0.45 | 40.1±0.1 | -0.97±0.54 | 40.9±0.2 | -0.94±0.99 |
|                                      |               | KF-OMI   | 46.6±0.1 | -1.24±0.22 | 51.8±0.2 | -1.69±0.55 | 50.8±0.1 | -1.74±0.47 | 42.4±0.1 | -1.03±0.49 | 40.5±0.1 | -1.07±1.04 |
|                                      | 2015-<br>2020 | KF-AQS   | 42.4±0.1 | 0.14±0.25  | 45.1±0.2 | 0.14±0.49  | 44.7±0.1 | 0.19±0.36  | 38.6±0.0 | -0.15±0.48 | 42.2±0.2 | 0.44±0.73  |
|                                      |               | KF-OMI   | 44.2±0.1 | -0.06±0.31 | 47.2±0.2 | -0.13±0.64 | 48.3±0.1 | 0.04±0.36  | 40.6±0.0 | -0.39±0.41 | 41.8±0.2 | 0.24±0.78  |

**Table. S5.** Averages (with units ppb or DU) and trends (with units ppb yr<sup>-1</sup> or DU yr<sup>-1</sup>) of surface and tropospheric column O<sub>3</sub> concentrations in 2005-2020 over Southeast US (Region #5) from observations (AQS and OMI) and a priori and a posteriori (KF) simulations.

| #1 Britain                           |               |            | Annual   |            | Spring   |            | Summer   |            | Autumn   |            | Winter   |            |
|--------------------------------------|---------------|------------|----------|------------|----------|------------|----------|------------|----------|------------|----------|------------|
|                                      |               |            | Mean     | Trend      |
| TS6.1<br>surface<br>(sampled)        | 2005-<br>2020 | AirBase    | 24.4±0.6 | 0.14±0.06  | 31.8±0.6 | 0.17±0.10  | 27.5±0.6 | -0.01±0.12 | 19.7±0.7 | 0.12±0.06  | 18.8±0.7 | 0.35±0.10  |
|                                      |               | a priori   | 29.9±0.2 | 0.10±0.03  | 36.0±0.1 | 0.11±0.05  | 38.7±0.3 | -0.10±0.09 | 25.2±0.2 | 0.08±0.05  | 19.9±0.4 | 0.31±0.09  |
|                                      |               | KF-AirBase | 26.0±0.3 | 0.09±0.05  | 32.9±0.3 | 0.11±0.08  | 30.7±0.3 | -0.07±0.10 | 21.3±0.4 | 0.07±0.05  | 19.1±0.5 | 0.28±0.09  |
| TS6.2<br>surface                     | 2005-<br>2020 | a priori   | 30.0±0.2 | 0.09±0.03  | 35.9±0.1 | 0.10±0.05  | 38.5±0.3 | -0.10±0.08 | 25.4±0.2 | 0.07±0.04  | 20.2±0.4 | 0.30±0.09  |
|                                      |               | KF-AirBase | 26.7±0.3 | 0.07±0.04  | 33.4±0.2 | 0.09±0.07  | 31.9±0.4 | -0.09±0.09 | 22.0±0.3 | 0.06±0.04  | 19.5±0.4 | 0.28±0.09  |
| TS6.3 trop.<br>column<br>(convolved) | 2005-<br>2020 | OMI        | 35.9±0.1 | -0.05±0.05 | 37.8±0.2 | -0.31±0.15 | 37.2±0.2 | -0.17±0.11 | 34.1±0.1 | 0.04±0.10  | 34.5±0.3 | 0.30±0.13  |
|                                      |               | a priori   | 30.9±0.1 | -0.07±0.03 | 32.3±0.1 | -0.16±0.06 | 32.2±0.1 | -0.24±0.06 | 29.8±0.1 | 0.03±0.04  | 29.3±0.1 | 0.12±0.09  |
|                                      |               | KF-OMI     | 33.7±0.1 | -0.25±0.03 | 36.2±0.1 | -0.43±0.09 | 35.9±0.2 | -0.29±0.07 | 31.7±0.1 | -0.19±0.06 | 30.8±0.1 | -0.03±0.08 |
| TS6.4<br>trop.<br>Column             | 2005-<br>2020 | a priori   | 30.1±0.1 | 0.00±0.03  | 32.9±0.1 | 0.01±0.06  | 31.8±0.2 | 0.02±0.08  | 27.9±0.1 | -0.02±0.06 | 27.8±0.1 | 0.01±0.08  |
|                                      |               | KF-AirBase | 29.7±0.1 | 0.00±0.03  | 32.6±0.1 | 0.01±0.06  | 31.0±0.2 | 0.02±0.08  | 27.5±0.1 | -0.02±0.05 | 27.7±0.1 | 0.01±0.08  |
|                                      |               | KF-OMI     | 34.7±0.1 | -0.49±0.05 | 39.8±0.1 | -0.60±0.08 | 36.9±0.2 | -0.07±0.09 | 30.9±0.1 | -0.52±0.08 | 30.6±0.1 | -0.71±0.13 |
|                                      | 2005-<br>2009 | KF-AirBase | 29.7±0.1 | -0.29±0.10 | 32.4±0.1 | 0.18±0.30  | 31.1±0.1 | -0.85±0.41 | 27.7±0.1 | -0.27±0.34 | 27.6±0.0 | -0.27±0.40 |
|                                      |               | KF-OMI     | 37.7±0.1 | -0.52±0.31 | 42.8±0.0 | 0.03±0.54  | 37.0±0.1 | -0.42±0.52 | 34.4±0.1 | -0.92±0.48 | 35.9±0.0 | -1.35±0.53 |
|                                      | 2010-<br>2014 | KF-AirBase | 29.5±0.1 | -0.16±0.21 | 32.8±0.1 | -0.67±0.39 | 30.3±0.1 | -0.04±0.40 | 27.3±0.1 | 0.29±0.40  | 27.5±0.1 | -0.40±0.71 |
|                                      |               | KF-OMI     | 34.2±0.1 | -0.88±0.31 | 40.7±0.1 | -1.52±0.44 | 37.0±0.1 | -0.41±0.60 | 29.9±0.1 | -0.25±0.41 | 28.3±0.1 | -1.00±0.53 |
|                                      | 2015-<br>2020 | KF-AirBase | 29.9±0.1 | 0.07±0.13  | 32.6±0.1 | 0.18±0.24  | 31.4±0.2 | 0.17±0.41  | 27.5±0.1 | -0.15±0.22 | 28.1±0.1 | -0.12±0.25 |
|                                      |               | KF-OMI     | 32.5±0.1 | -0.35±0.11 | 36.6±0.1 | -0.52±0.12 | 36.7±0.2 | -0.45±0.43 | 28.7±0.1 | -0.42±0.23 | 28.2±0.1 | -0.18±0.24 |

**Table. S6.** Averages (with units ppb or DU) and trends (with units ppb yr<sup>-1</sup> or DU yr<sup>-1</sup>) of surface and tropospheric column O<sub>3</sub> concentrations in 2005-2020 over Britain (Region #1) from observations (AirBase and OMI) and a priori and a posteriori (KF) simulations. Grids with low and medium anthropogenic NO<sub>x</sub> emissions are excluded in Britain.

| #2 Central EU                        |               |            | Annual   |            | Spring   |            | Summer   |            | Autumn   |            | Winter   |            |
|--------------------------------------|---------------|------------|----------|------------|----------|------------|----------|------------|----------|------------|----------|------------|
|                                      |               |            | Mean     | Trend      |
| TS7.1<br>surface<br>(sampled)        | 2005-<br>2020 | AirBase    | 28.0±0.3 | 0.21±0.06  | 35.5±0.3 | 0.14±0.10  | 38.3±0.4 | 0.17±0.17  | 20.5±0.2 | 0.22±0.08  | 17.7±0.3 | 0.33±0.10  |
|                                      |               | a priori   | 30.5±0.2 | 0.14±0.04  | 36.5±0.2 | 0.12±0.05  | 44.7±0.2 | 0.03±0.11  | 25.2±0.4 | 0.14±0.07  | 15.9±0.3 | 0.27±0.08  |
|                                      |               | KF-AirBase | 28.2±0.2 | 0.16±0.06  | 35.4±0.2 | 0.13±0.09  | 39.0±0.3 | 0.12±0.15  | 21.3±0.2 | 0.17±0.07  | 17.4±0.2 | 0.26±0.08  |
| TS7.2<br>surface                     | 2005-<br>2020 | a priori   | 30.6±0.3 | 0.14±0.04  | 36.5±0.2 | 0.12±0.05  | 44.8±0.2 | 0.03±0.11  | 25.2±0.3 | 0.14±0.07  | 15.9±0.3 | 0.27±0.08  |
|                                      |               | KF-AirBase | 28.3±0.2 | 0.16±0.06  | 35.4±0.2 | 0.12±0.09  | 39.1±0.3 | 0.12±0.15  | 21.3±0.2 | 0.17±0.07  | 17.3±0.2 | 0.25±0.08  |
| TS7.3 trop.<br>column<br>(convolved) | 2005-<br>2020 | OMI        | 35.5±0.1 | -0.22±0.07 | 36.6±0.2 | -0.51±0.15 | 37.8±0.1 | -0.25±0.09 | 33.4±0.1 | -0.14±0.12 | 34.2±0.2 | -0.02±0.13 |
|                                      |               | a priori   | 31.6±0.1 | -0.13±0.04 | 32.9±0.1 | -0.26±0.07 | 34.4±0.1 | -0.23±0.07 | 30.2±0.1 | -0.02±0.03 | 28.9±0.1 | -0.02±0.08 |
|                                      |               | KF-OMI     | 34.0±0.1 | -0.31±0.05 | 36.2±0.1 | -0.52±0.09 | 37.5±0.1 | -0.29±0.08 | 31.9±0.1 | -0.22±0.06 | 30.5±0.1 | -0.20±0.07 |
| TS7.4<br>trop.<br>Column             | 2005-<br>2020 | a priori   | 31.0±0.0 | 0.04±0.03  | 33.4±0.1 | 0.02±0.07  | 34.7±0.1 | 0.09±0.07  | 28.5±0.0 | -0.01±0.06 | 27.3±0.1 | 0.06±0.06  |
|                                      |               | KF-AirBase | 30.4±0.0 | 0.04±0.03  | 33.0±0.1 | 0.02±0.07  | 33.5±0.1 | 0.10±0.08  | 27.8±0.0 | -0.01±0.06 | 27.4±0.1 | 0.06±0.06  |
|                                      |               | KF-OMI     | 34.9±0.1 | -0.38±0.05 | 39.3±0.1 | -0.50±0.07 | 38.9±0.0 | 0.03±0.08  | 31.1±0.1 | -0.44±0.07 | 30.0±0.1 | -0.62±0.12 |
|                                      | 2005-<br>2009 | KF-AirBase | 30.2±0.0 | -0.24±0.13 | 32.7±0.0 | 0.07±0.39  | 33.2±0.0 | -0.50±0.40 | 27.9±0.1 | -0.48±0.21 | 27.0±0.1 | -0.28±0.31 |
|                                      |               | KF-OMI     | 37.4±0.1 | -0.36±0.31 | 41.6±0.1 | -0.12±0.47 | 38.5±0.1 | -0.13±0.47 | 34.1±0.1 | -0.83±0.39 | 34.8±0.1 | -1.25±0.58 |
|                                      | 2010-<br>2014 | KF-AirBase | 30.2±0.0 | -0.11±0.23 | 33.3±0.0 | -0.61±0.53 | 32.8±0.0 | -0.06±0.39 | 27.7±0.0 | 0.24±0.42  | 27.0±0.1 | -0.17±0.38 |
|                                      |               | KF-OMI     | 34.4±0.1 | -0.72±0.14 | 40.3±0.1 | -1.49±0.13 | 38.8±0.0 | -0.30±0.45 | 30.3±0.1 | -0.12±0.37 | 27.8±0.1 | -0.71±0.34 |
|                                      | 2015-<br>2020 | KF-AirBase | 30.8±0.0 | 0.11±0.16  | 33.0±0.1 | 0.19±0.28  | 34.5±0.1 | 0.07±0.41  | 27.8±0.0 | 0.13±0.27  | 27.9±0.1 | -0.12±0.27 |
|                                      |               | KF-OMI     | 33.3±0.0 | -0.23±0.14 | 36.7±0.1 | -0.45±0.16 | 39.3±0.1 | -0.31±0.47 | 29.2±0.0 | -0.11±0.29 | 28.0±0.1 | -0.18±0.26 |

**Table. S7.** Averages (with units ppb or DU) and trends (with units ppb yr<sup>-1</sup> or DU yr<sup>-1</sup>) of surface and tropospheric column O<sub>3</sub> concentrations in 2005-2020 over Central EU (Region #2) from observations (AirBase and OMI) and a priori and a posteriori (KF) simulations. Grids with low and medium anthropogenic NO<sub>x</sub> emissions are excluded in Central EU.

| #3 Western EU                        |               |            | Annual   |            | Spring   |            | Summer   |            | Autumn   |            | Winter   |            |
|--------------------------------------|---------------|------------|----------|------------|----------|------------|----------|------------|----------|------------|----------|------------|
|                                      |               |            | Mean     | Trend      |
| TS8.1<br>surface<br>(sampled)        | 2005-<br>2020 | AirBase    | 32.3±0.2 | 0.11±0.05  | 38.9±0.2 | 0.05±0.07  | 40.1±0.4 | -0.06±0.14 | 27.6±0.3 | 0.15±0.05  | 22.6±0.3 | 0.30±0.06  |
|                                      |               | a priori   | 35.9±0.2 | 0.02±0.03  | 40.6±0.2 | -0.12±0.05 | 44.9±0.3 | -0.10±0.11 | 32.9±0.3 | 0.03±0.06  | 25.2±0.3 | 0.23±0.06  |
|                                      |               | KF-AirBase | 32.5±0.2 | 0.05±0.04  | 38.6±0.2 | -0.02±0.07 | 40.2±0.2 | -0.10±0.12 | 28.4±0.2 | 0.07±0.05  | 23.0±0.3 | 0.25±0.05  |
| TS8.2<br>surface                     | 2005-<br>2020 | a priori   | 36.0±0.2 | 0.00±0.03  | 40.6±0.2 | -0.13±0.05 | 44.8±0.2 | -0.12±0.11 | 33.2±0.2 | 0.01±0.06  | 25.6±0.3 | 0.22±0.06  |
|                                      |               | KF-AirBase | 32.8±0.2 | 0.03±0.04  | 38.6±0.1 | -0.05±0.06 | 40.2±0.2 | -0.12±0.12 | 28.8±0.2 | 0.05±0.05  | 23.5±0.2 | 0.23±0.05  |
| TS8.3 trop.<br>column<br>(convolved) | 2005-<br>2020 | OMI        | 36.3±0.1 | -0.16±0.08 | 37.8±0.1 | -0.29±0.18 | 41.6±0.2 | -0.10±0.10 | 34.7±0.1 | -0.07±0.08 | 31.0±0.1 | -0.21±0.16 |
|                                      |               | a priori   | 33.3±0.1 | -0.10±0.04 | 34.0±0.1 | -0.19±0.07 | 37.8±0.1 | -0.17±0.06 | 32.0±0.1 | -0.01±0.03 | 29.5±0.1 | -0.04±0.06 |
|                                      |               | KF-OMI     | 35.7±0.1 | -0.26±0.05 | 37.5±0.1 | -0.40±0.10 | 41.3±0.2 | -0.20±0.07 | 33.7±0.1 | -0.20±0.05 | 30.5±0.1 | -0.24±0.07 |
| TS8.4<br>trop.<br>Column             | 2005-<br>2020 | a priori   | 32.5±0.1 | 0.02±0.03  | 34.1±0.1 | -0.02±0.06 | 37.0±0.1 | 0.03±0.06  | 30.0±0.1 | -0.01±0.05 | 28.7±0.1 | 0.09±0.06  |
|                                      |               | KF-AirBase | 31.8±0.1 | 0.03±0.03  | 33.6±0.1 | 0.00±0.06  | 35.9±0.1 | 0.03±0.06  | 29.3±0.1 | 0.00±0.04  | 28.5±0.1 | 0.09±0.06  |
|                                      |               | KF-OMI     | 36.4±0.1 | -0.36±0.04 | 40.0±0.1 | -0.44±0.07 | 41.4±0.1 | -0.02±0.07 | 32.7±0.1 | -0.41±0.06 | 31.2±0.1 | -0.53±0.11 |
|                                      | 2005-<br>2009 | KF-AirBase | 31.6±0.1 | -0.23±0.11 | 33.3±0.1 | -0.15±0.20 | 35.7±0.1 | -0.64±0.30 | 29.3±0.1 | -0.21±0.34 | 27.9±0.1 | -0.06±0.35 |
|                                      |               | KF-OMI     | 38.5±0.1 | -0.40±0.22 | 41.8±0.1 | -0.53±0.39 | 41.1±0.1 | -0.25±0.34 | 35.4±0.1 | -0.55±0.52 | 35.4±0.1 | -0.81±0.49 |
|                                      | 2010-<br>2014 | KF-AirBase | 31.7±0.1 | -0.25±0.24 | 33.8±0.1 | -0.60±0.51 | 35.5±0.1 | -0.38±0.32 | 29.2±0.1 | -0.14±0.29 | 28.4±0.1 | -0.14±0.49 |
|                                      |               | KF-OMI     | 36.2±0.1 | -0.79±0.12 | 41.1±0.1 | -1.19±0.33 | 41.6±0.1 | -0.54±0.34 | 32.1±0.1 | -0.47±0.19 | 29.2±0.1 | -0.67±0.25 |
|                                      | 2015-<br>2020 | KF-AirBase | 32.1±0.1 | -0.03±0.08 | 33.6±0.1 | -0.04±0.22 | 36.5±0.1 | -0.20±0.21 | 29.4±0.1 | -0.03±0.17 | 29.1±0.1 | 0.02±0.28  |
|                                      |               | KF-OMI     | 34.8±0.1 | -0.32±0.15 | 37.6±0.1 | -0.57±0.23 | 41.4±0.1 | -0.45±0.40 | 31.1±0.1 | -0.35±0.19 | 29.3±0.1 | -0.09±0.28 |

**Table. S8.** Averages (with units ppb or DU) and trends (with units ppb yr<sup>-1</sup> or DU yr<sup>-1</sup>) of surface and tropospheric column O<sub>3</sub> concentrations in 2005-2020 over Western EU (Region #3) from observations (AirBase and OMI) and a priori and a posteriori (KF) simulations.

| #4 Iberian Peninsula                 |               |            | Annual   |            | Spring   |            | Summer   |            | Autumn   |            | Winter   |            |
|--------------------------------------|---------------|------------|----------|------------|----------|------------|----------|------------|----------|------------|----------|------------|
|                                      |               |            | Mean     | Trend      |
| TS9.1<br>surface<br>(sampled)        | 2005-<br>2020 | AirBase    | 34.2±0.4 | 0.06±0.06  | 39.5±0.4 | 0.02±0.08  | 41.1±0.6 | -0.15±0.09 | 31.2±0.4 | 0.12±0.08  | 25.3±0.4 | 0.23±0.08  |
|                                      |               | a priori   | 40.3±0.2 | -0.06±0.03 | 43.9±0.1 | -0.21±0.05 | 48.4±0.4 | -0.18±0.11 | 38.1±0.2 | -0.01±0.06 | 30.6±0.1 | 0.13±0.05  |
|                                      |               | KF-AirBase | 35.2±0.3 | -0.02±0.04 | 40.0±0.3 | -0.08±0.07 | 42.1±0.4 | -0.20±0.09 | 32.5±0.3 | 0.02±0.07  | 26.2±0.3 | 0.17±0.06  |
| TS9.2<br>surface                     | 2005-<br>2020 | a priori   | 40.4±0.1 | -0.07±0.03 | 43.9±0.1 | -0.22±0.05 | 48.7±0.3 | -0.17±0.12 | 38.4±0.1 | -0.02±0.07 | 30.9±0.1 | 0.10±0.05  |
|                                      |               | KF-AirBase | 36.2±0.2 | -0.05±0.04 | 40.6±0.2 | -0.13±0.06 | 43.4±0.3 | -0.22±0.09 | 33.4±0.2 | 0.00±0.06  | 27.2±0.2 | 0.13±0.05  |
| TS9.3 trop.<br>column<br>(convolved) | 2005-<br>2020 | OMI        | 37.8±0.2 | -0.12±0.08 | 39.1±0.2 | -0.20±0.18 | 45.4±0.2 | 0.05±0.10  | 35.7±0.2 | -0.22±0.07 | 30.9±0.1 | -0.12±0.17 |
|                                      |               | a priori   | 35.3±0.1 | -0.08±0.04 | 36.0±0.1 | -0.16±0.09 | 41.5±0.2 | -0.06±0.06 | 33.3±0.1 | -0.07±0.04 | 30.5±0.1 | -0.05±0.05 |
|                                      |               | KF-OMI     | 37.8±0.1 | -0.21±0.05 | 39.2±0.1 | -0.30±0.12 | 45.3±0.2 | -0.03±0.07 | 35.2±0.1 | -0.28±0.05 | 31.2±0.1 | -0.24±0.06 |
| TS9.4<br>trop.<br>Column             | 2005-<br>2020 | a priori   | 34.2±0.1 | 0.02±0.03  | 35.0±0.1 | -0.06±0.06 | 40.7±0.2 | 0.03±0.06  | 31.3±0.1 | 0.00±0.05  | 29.9±0.1 | 0.09±0.07  |
|                                      |               | KF-AirBase | 33.6±0.1 | 0.02±0.03  | 34.5±0.1 | -0.04±0.06 | 39.7±0.2 | 0.02±0.06  | 30.6±0.1 | 0.00±0.05  | 29.5±0.1 | 0.10±0.06  |
|                                      |               | KF-OMI     | 38.1±0.1 | -0.30±0.04 | 40.8±0.1 | -0.39±0.09 | 45.3±0.2 | 0.01±0.05  | 34.2±0.1 | -0.36±0.07 | 32.0±0.1 | -0.46±0.10 |
|                                      | 2005-<br>2009 | KF-AirBase | 33.3±0.1 | -0.26±0.05 | 34.4±0.1 | -0.20±0.35 | 39.5±0.2 | -0.69±0.26 | 30.4±0.1 | -0.31±0.38 | 29.0±0.1 | 0.02±0.30  |
|                                      |               | KF-OMI     | 39.7±0.1 | -0.41±0.20 | 42.1±0.1 | -0.33±0.40 | 44.9±0.2 | -0.43±0.29 | 36.3±0.1 | -0.55±0.59 | 35.6±0.1 | -0.50±0.37 |
|                                      | 2010-<br>2014 | KF-AirBase | 33.6±0.1 | -0.38±0.23 | 34.7±0.1 | -0.63±0.28 | 39.4±0.2 | -0.42±0.36 | 30.7±0.1 | -0.68±0.13 | 29.7±0.1 | 0.10±0.50  |
|                                      |               | KF-OMI     | 38.2±0.1 | -0.86±0.27 | 42.0±0.2 | -1.18±0.43 | 45.6±0.2 | -0.44±0.32 | 34.0±0.1 | -0.97±0.24 | 30.4±0.1 | -0.37±0.26 |
|                                      | 2015-<br>2020 | KF-AirBase | 33.8±0.1 | 0.03±0.09  | 34.4±0.1 | -0.28±0.23 | 40.1±0.2 | 0.05±0.15  | 30.7±0.1 | 0.10±0.20  | 29.9±0.1 | 0.34±0.34  |
|                                      |               | KF-OMI     | 36.7±0.1 | -0.23±0.19 | 38.6±0.1 | -0.74±0.44 | 45.4±0.2 | -0.07±0.19 | 32.7±0.1 | -0.29±0.24 | 30.2±0.1 | 0.20±0.34  |

**Table. S9.** Averages (with units ppb or DU) and trends (with units ppb yr<sup>-1</sup> or DU yr<sup>-1</sup>) of surface and tropospheric column O<sub>3</sub> concentrations in 2005-2020 over Iberian Peninsula (Region #4) from observations (AirBase and OMI) and a priori and a posteriori (KF) simulations.

| #5 Apennine Peninsula                 |               |            | Annual   |            | Spring   |            | Summer   |            | Autumn   |            | Winter   |            |
|---------------------------------------|---------------|------------|----------|------------|----------|------------|----------|------------|----------|------------|----------|------------|
|                                       |               |            | Mean     | Trend      |
| TS10.1<br>surface<br>(sampled)        | 2005-<br>2020 | AirBase    | 34.0±0.4 | 0.08±0.07  | 39.2±0.5 | -0.06±0.09 | 45.5±0.8 | -0.03±0.11 | 29.2±0.5 | 0.17±0.07  | 22.0±0.7 | 0.22±0.06  |
|                                       |               | a priori   | 41.8±0.2 | -0.05±0.03 | 45.3±0.1 | -0.30±0.05 | 53.9±0.2 | -0.10±0.07 | 39.0±0.2 | 0.00±0.05  | 29.1±0.4 | 0.20±0.05  |
|                                       |               | KF-AirBase | 35.3±0.3 | 0.04±0.06  | 40.1±0.2 | -0.09±0.08 | 46.4±0.4 | -0.04±0.11 | 31.0±0.4 | 0.11±0.06  | 23.7±0.6 | 0.18±0.05  |
| TS10.2<br>surface                     | 2005-<br>2020 | a priori   | 41.8±0.1 | -0.06±0.02 | 45.2±0.1 | -0.30±0.05 | 52.8±0.2 | -0.10±0.07 | 39.2±0.1 | -0.01±0.05 | 30.1±0.2 | 0.17±0.05  |
|                                       |               | KF-AirBase | 36.6±0.2 | -0.02±0.05 | 41.0±0.2 | -0.16±0.06 | 46.1±0.2 | -0.11±0.10 | 33.0±0.2 | 0.03±0.05  | 26.5±0.3 | 0.16±0.04  |
| TS10.3 trop.<br>column<br>(convolved) | 2005-<br>2020 | OMI        | 38.7±0.2 | -0.13±0.07 | 39.5±0.2 | -0.25±0.14 | 46.7±0.2 | 0.02±0.10  | 36.5±0.2 | -0.20±0.06 | 31.9±0.1 | -0.15±0.11 |
|                                       |               | a priori   | 35.4±0.2 | -0.08±0.04 | 35.6±0.1 | -0.17±0.07 | 43.0±0.2 | -0.02±0.07 | 33.4±0.1 | -0.07±0.03 | 29.6±0.1 | -0.06±0.06 |
|                                       |               | KF-OMI     | 37.7±0.2 | -0.21±0.04 | 38.7±0.2 | -0.33±0.09 | 46.0±0.2 | -0.02±0.08 | 35.2±0.1 | -0.25±0.04 | 30.7±0.1 | -0.25±0.06 |
| TS10.4<br>trop.<br>Column             | 2005-<br>2020 | a priori   | 34.9±0.1 | 0.04±0.04  | 35.3±0.1 | -0.10±0.07 | 44.1±0.3 | 0.12±0.07  | 31.8±0.1 | 0.02±0.05  | 28.5±0.1 | 0.09±0.06  |
|                                       |               | KF-AirBase | 34.0±0.1 | 0.04±0.04  | 34.5±0.1 | -0.08±0.07 | 42.7±0.3 | 0.11±0.08  | 30.8±0.1 | 0.03±0.05  | 28.1±0.1 | 0.10±0.05  |
|                                       |               | KF-OMI     | 38.2±0.1 | -0.26±0.04 | 40.3±0.1 | -0.42±0.08 | 47.6±0.3 | 0.11±0.08  | 34.2±0.1 | -0.29±0.05 | 30.8±0.1 | -0.46±0.11 |
|                                       | 2005-<br>2009 | KF-AirBase | 33.5±0.2 | -0.24±0.14 | 34.6±0.1 | -0.68±0.13 | 41.8±0.3 | 0.17±0.50  | 30.4±0.1 | -0.57±0.34 | 27.6±0.1 | -0.39±0.32 |
|                                       |               | KF-OMI     | 39.6±0.2 | -0.29±0.18 | 41.7±0.1 | -0.80±0.23 | 46.5±0.2 | 0.43±0.44  | 36.0±0.1 | -0.74±0.36 | 34.5±0.1 | -1.06±0.41 |
|                                       | 2010-<br>2014 | KF-AirBase | 34.1±0.1 | -0.28±0.36 | 34.9±0.1 | -0.58±0.55 | 42.8±0.3 | -0.51±0.71 | 31.0±0.1 | -0.02±0.27 | 27.6±0.1 | -0.28±0.17 |
|                                       |               | KF-OMI     | 38.3±0.2 | -0.81±0.22 | 41.5±0.1 | -1.19±0.50 | 48.2±0.3 | -0.67±0.67 | 34.0±0.1 | -0.45±0.21 | 28.7±0.1 | -0.79±0.33 |
|                                       | 2015-<br>2020 | KF-AirBase | 34.2±0.1 | 0.03±0.09  | 34.2±0.1 | -0.24±0.32 | 43.3±0.2 | -0.07±0.16 | 30.8±0.1 | 0.25±0.07  | 28.9±0.1 | 0.01±0.25  |
|                                       |               | KF-OMI     | 37.0±0.2 | -0.19±0.07 | 38.0±0.1 | -0.70±0.32 | 48.0±0.3 | -0.16±0.14 | 32.9±0.1 | -0.01±0.09 | 29.5±0.1 | -0.11±0.27 |

**Table. S10.** Averages (with units ppb or DU) and trends (with units ppb yr<sup>-1</sup> or DU yr<sup>-1</sup>) of surface and tropospheric column O<sub>3</sub> concentrations in 2005-2020 over Apennine Peninsula (Region #5) from observations (AirBase and OMI) and a priori and a posteriori (KF) simulations.
